# Supplementary material for: Upregulated Fcrl5 disrupts B cell anergy and causes autoimmune disease
Source: PubMed Central journal article supplement (PMC10569490; doi:10.3389/fimmu.2023.1276014), 2023-09-28
Supplement: DataSheet_1.pdf [file DataSheet_1.pdf]

## *Supplementary Material*

### **Supplementary Figures**

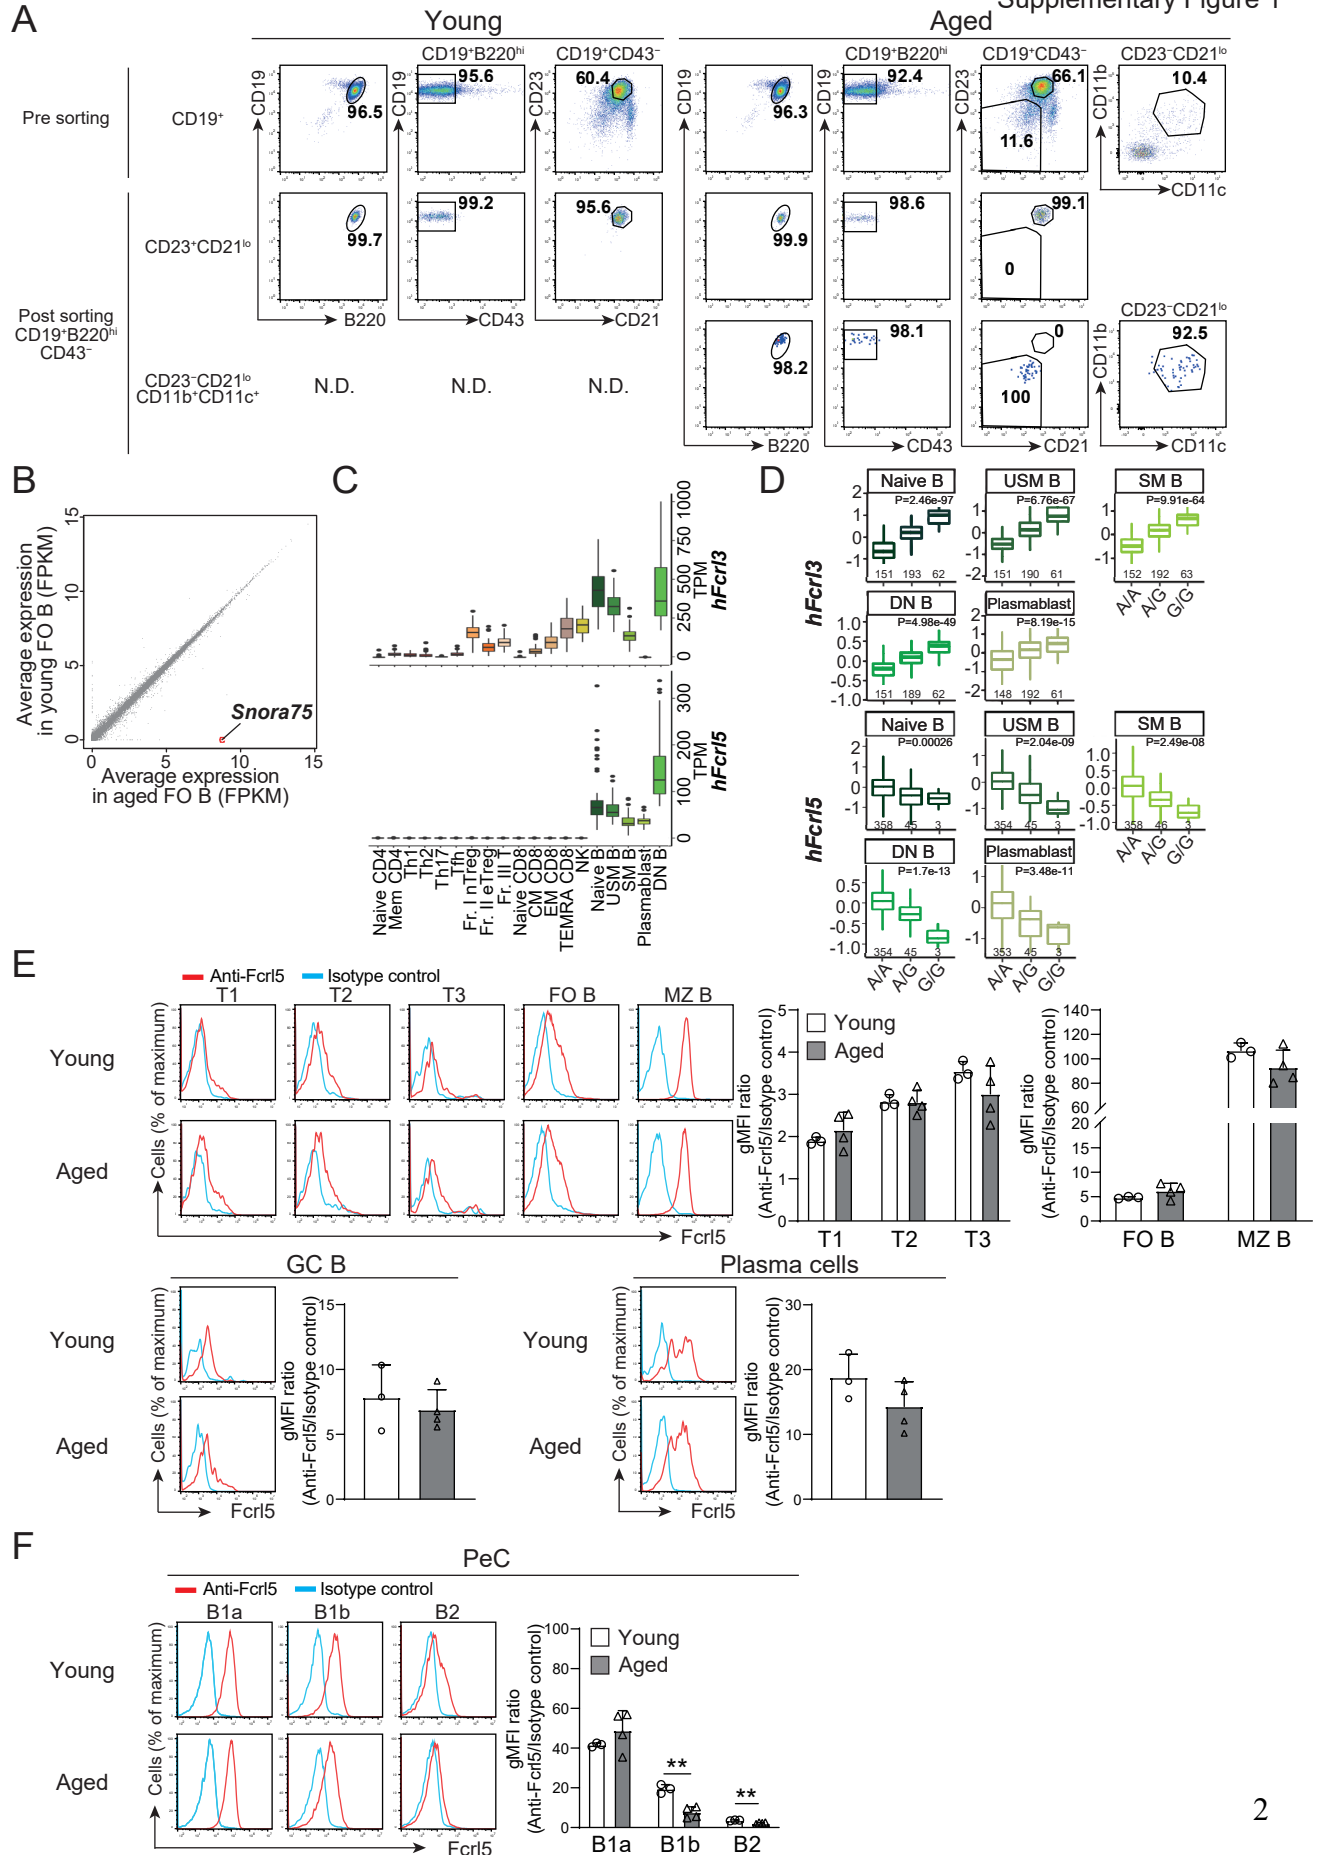

A

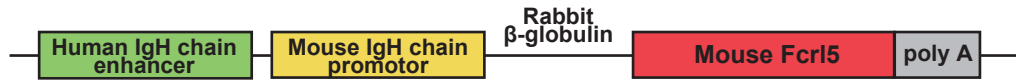

B

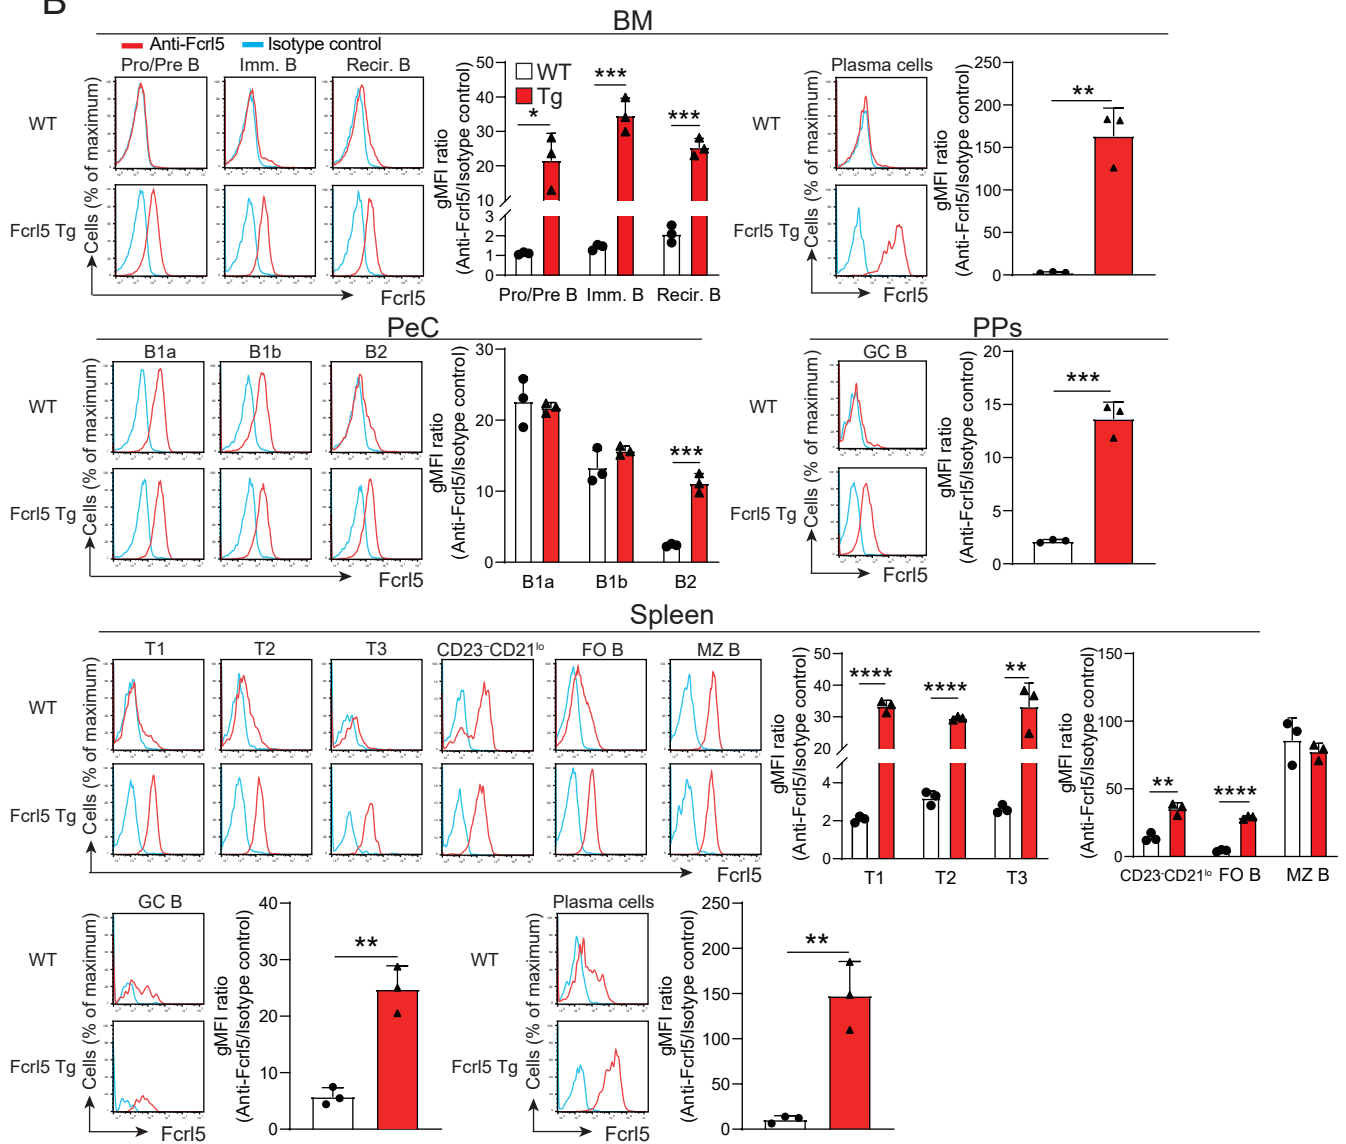

C

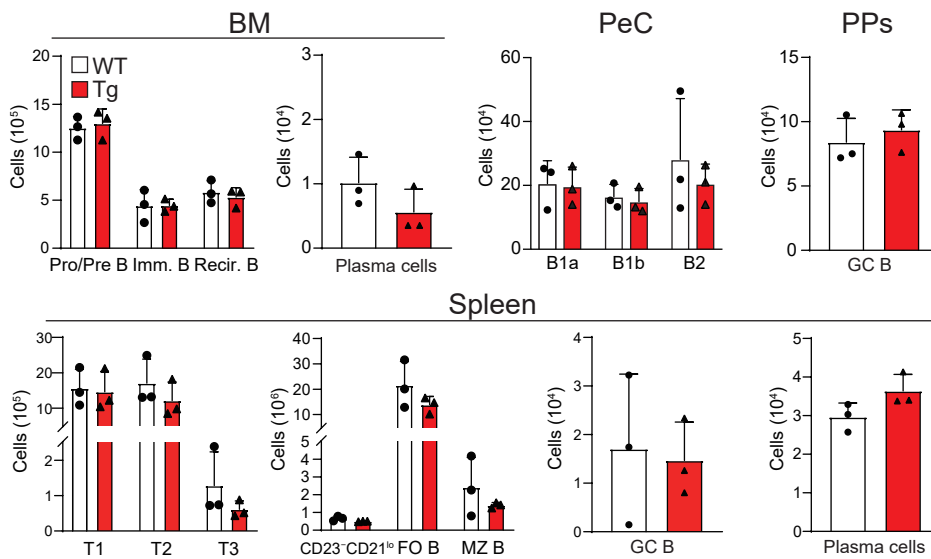

A

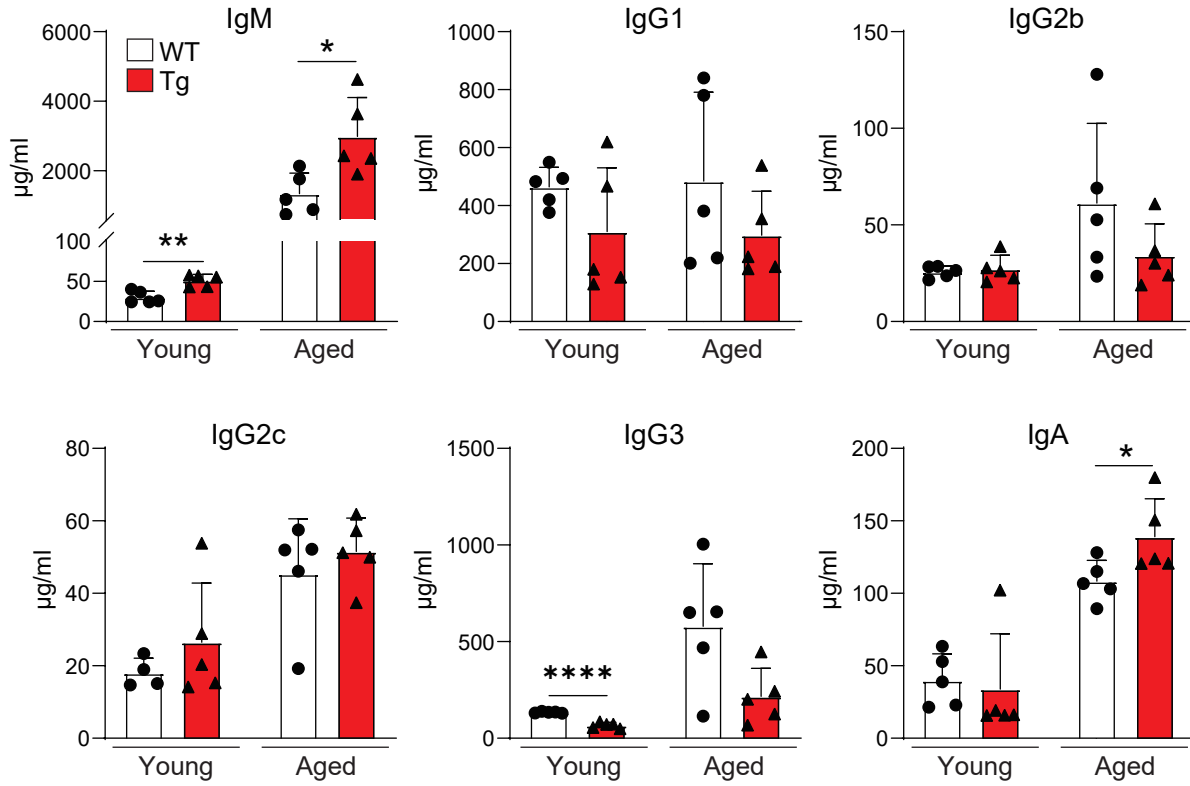

B

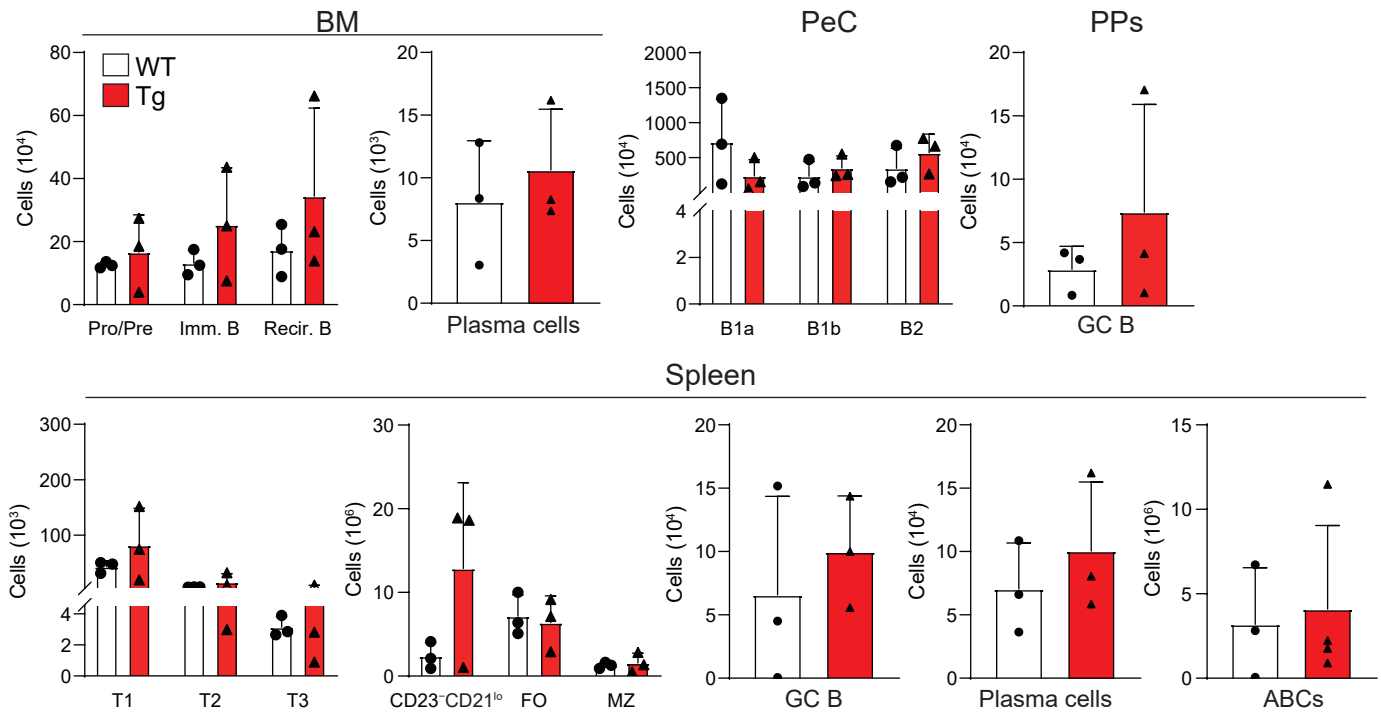

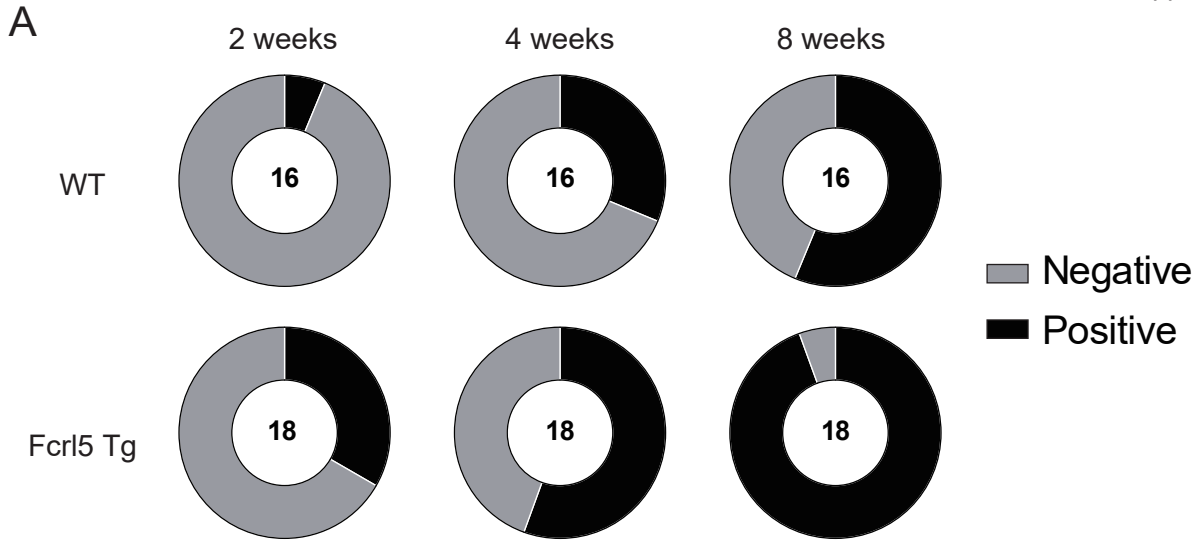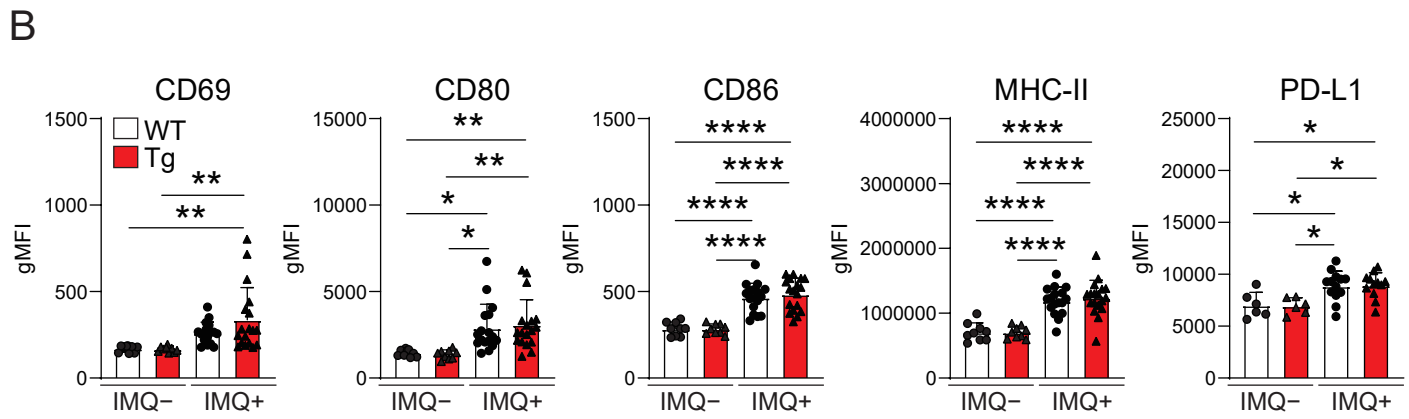

A

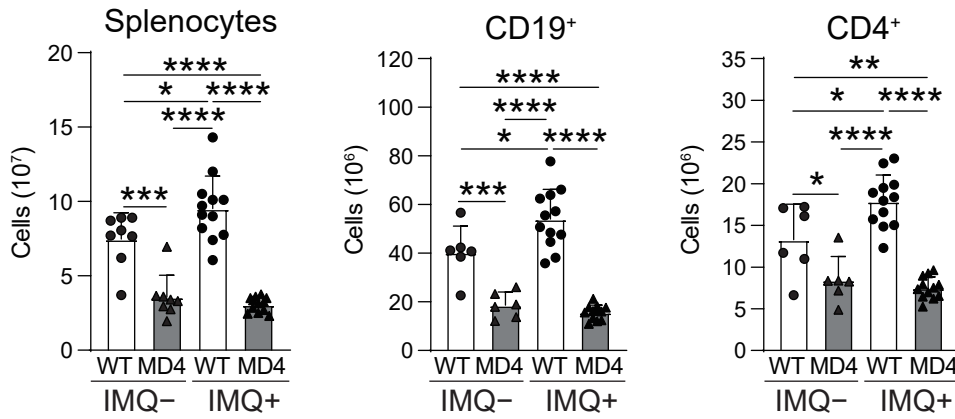

B

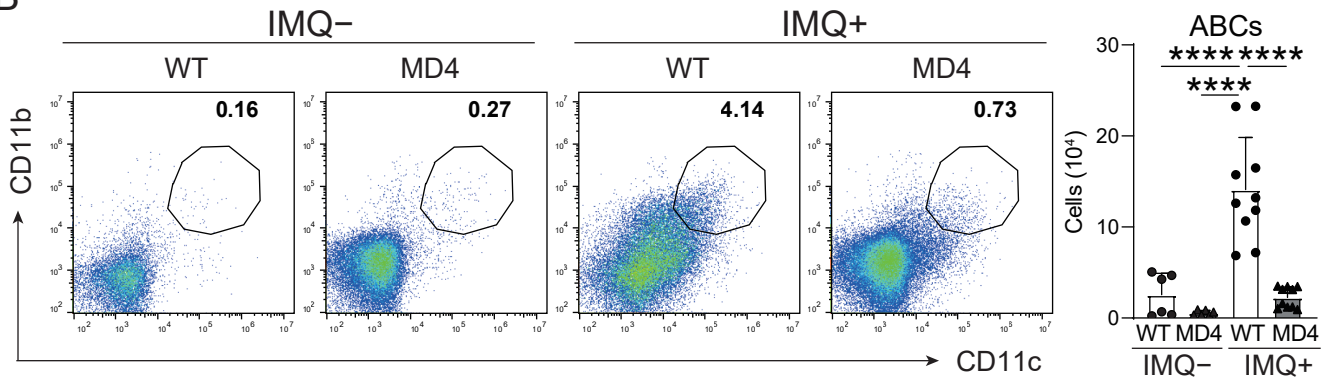

C

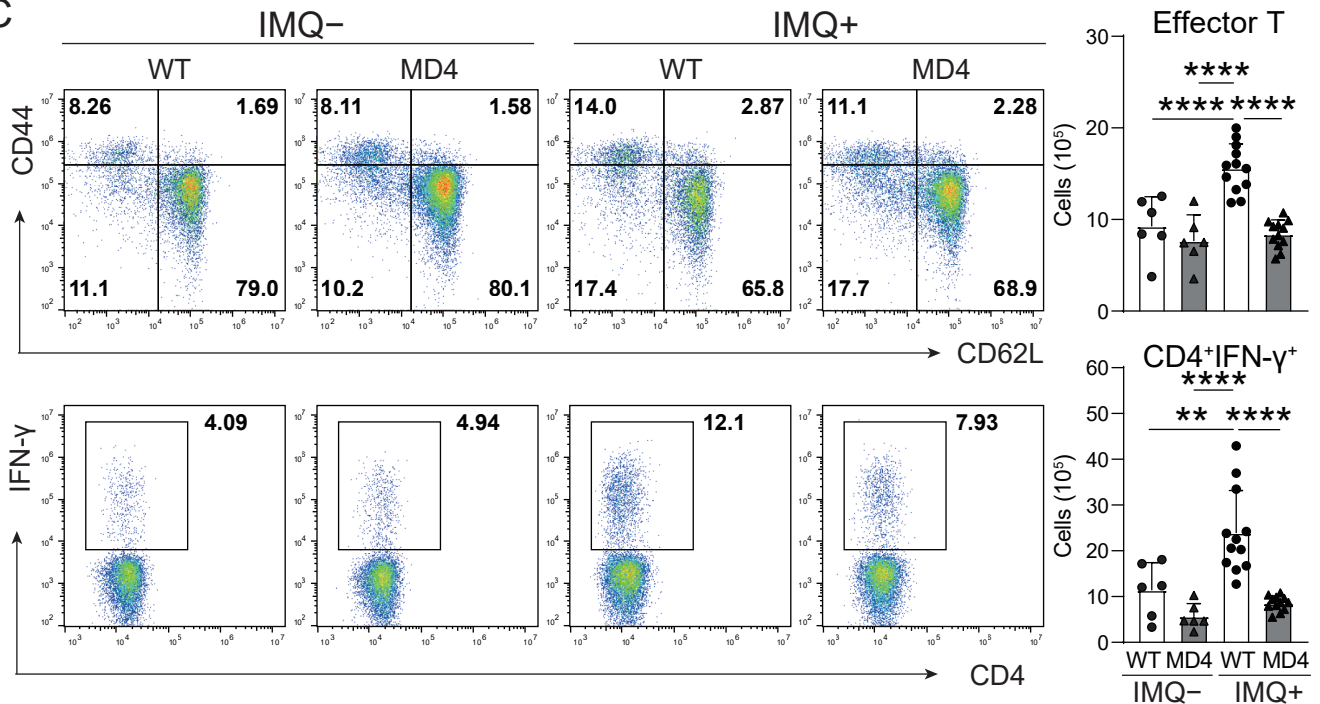

## Supplementary Figure legends

**Supplementary Figure 1. Gating strategy and distribution of Fcrl5 expression.** (A) Gating strategy employed to sort FO B (CD19<sup>+</sup>B220<sup>hi</sup>CD43<sup>-</sup>CD23<sup>+</sup>CD21<sup>lo</sup>) cells and ABCs (CD19<sup>+</sup>B220<sup>hi</sup>CD43<sup>-</sup>CD23<sup>-</sup>CD21<sup>lo</sup>CD11b<sup>+</sup>CD11c<sup>+</sup>) from young and aged WT mice (n=3 mice each). (B) Differential gene expression of FO B cells from young WT mice and FO B cells from aged WT mice (n=3 mice each) presented as a scatter plot. (C) Expression of *hFcrl3* and *hFcrl5* in immune subsets: unswitched memory B (USM B), switched memory B (SM B), and double negative B (DN B) cells in healthy individuals (n=79). TPM, Transcript per million. (D) eQTL effect of GWAS SNP rs7528684 (*hFcrl3*) and rs11264750 (*hFcrl5*) in the immune subsets from patients with 10 immunological disorders (n=416). P-values were obtained by testing the alternative hypothesis that the slope of a linear regression model between genotype and expression deviates from 0. (E) Representative histograms and gMFIs of Fcrl5 expression on T1 (CD19<sup>+</sup>CD93<sup>+</sup>IgM<sup>+</sup>CD23<sup>-</sup>), T2 (CD19<sup>+</sup>CD93<sup>+</sup>IgM<sup>+</sup>CD23<sup>+</sup>), T3 (CD19<sup>+</sup>CD93<sup>+</sup>IgM<sup>-</sup>CD23<sup>+</sup>), FO B (CD19<sup>+</sup>CD93<sup>-</sup>CD23<sup>+</sup>CD21<sup>lo</sup>), MZ B (CD19<sup>+</sup>CD93<sup>-</sup>CD23<sup>-</sup>CD21<sup>hi</sup>), GC B (B220<sup>+</sup>Fas<sup>+</sup>GL7<sup>+</sup>), and plasma (CD138<sup>+</sup>TACI<sup>+</sup>) cells from young WT (n=3) and aged WT mice (n=4). Data are representative of two independent experiments. (F) Representative histograms and gMFIs of Fcrl5 expression of B1a (CD19<sup>+</sup>CD5<sup>+</sup>CD23<sup>-</sup>), B1b (CD19<sup>+</sup>CD5<sup>-</sup>CD23<sup>-</sup>), and B2 (CD19<sup>+</sup>CD5<sup>-</sup>CD23<sup>+</sup>) cells in PeC from young WT (n=3) and aged WT (n=4) mice. Data are representative of two independent experiments. Statistical data are shown as mean values with s.d., and data were analyzed by unpaired Student's t-test. \*\*P<0.01.

**Supplementary Figure 2. Analysis of Fcrl5 expression and B cell development in young Fcrl5 Tg mice.** (A) A scheme of the constructs used to generate Fcrl5 Tg mice. (B) Representative histograms and gMFIs of Fcrl5 expression on Pro/Pre B (B220<sup>+</sup>IgM<sup>-</sup>), Immature B (Imm. B; B220<sup>lo</sup>IgM<sup>+</sup>), recirculating B (Recir. B; B220<sup>hi</sup>IgM<sup>+</sup>) and plasma cells (CD138<sup>+</sup>TACI<sup>+</sup>) in BM, B1a (CD19<sup>+</sup>CD5<sup>+</sup>CD23<sup>-</sup>), B1b (CD19<sup>+</sup>CD5<sup>-</sup>CD23<sup>-</sup>), and B2 (CD19<sup>+</sup>CD5<sup>-</sup>CD23<sup>+</sup>) cells in PeC, GC B (B220<sup>+</sup>Fas<sup>+</sup>GL7<sup>+</sup>) in PPs and T1 (CD19<sup>+</sup>CD93<sup>+</sup>IgM<sup>+</sup>CD23<sup>-</sup>), T2 (CD19<sup>+</sup>CD93<sup>+</sup>IgM<sup>+</sup>CD23<sup>+</sup>), T3 (CD19<sup>+</sup>CD93<sup>+</sup>IgM<sup>-</sup>CD23<sup>+</sup>), CD23<sup>-</sup>CD21<sup>lo</sup> (CD19<sup>+</sup>CD93<sup>-</sup>CD23<sup>-</sup>CD21<sup>lo</sup>), FO B (CD19<sup>+</sup>CD93<sup>-</sup>CD23<sup>+</sup>CD21<sup>lo</sup>), MZ B (CD19<sup>+</sup>CD93<sup>-</sup>CD23<sup>-</sup>CD21<sup>hi</sup>), GC B (B220<sup>+</sup>Fas<sup>+</sup>GL7<sup>+</sup>), and plasma (CD138<sup>+</sup>TACI<sup>+</sup>) cells in spleen from young WT and young Fcrl5 Tg mice (n=3 mice each). Data are representative of four independent experiments. (C) Absolute numbers of B cell subsets described in (B) from young WT and young Fcrl5 Tg mice (n=3 mice each). Data are representative of five independent experiments. Statistical data are shown as mean values with s.d., and data were analyzed by unpaired Student's t-test. \*P<0.05, \*\*P<0.01, \*\*\*P<0.001, \*\*\*\*P<0.0001.

**Supplementary Figure 3. Analysis of natural antibody titers in young and aged Fcrl5 Tg mice and B cell development in aged Fcrl5 Tg mice.** (A) Antibody production in serum isolated from young WT, young Fcrl5 Tg, aged WT, and aged Fcrl5 Tg mice (n=5 mice each), assayed by ELISA. Data are pooled from two independent experiments. (B) Absolute numbers of Pro/Pre B (B220<sup>+</sup>IgM<sup>-</sup>), Immature B (Imm. B; B220<sup>lo</sup>IgM<sup>+</sup>), recirculating B (Recir. B; B220<sup>hi</sup>IgM<sup>+</sup>), and plasma cells (CD138<sup>+</sup>TACI<sup>+</sup>) in BM, B1a (CD19<sup>+</sup>CD5<sup>+</sup>CD23<sup>-</sup>), B1b (CD19<sup>+</sup>CD5<sup>-</sup>CD23<sup>-</sup>), and B2 (CD19<sup>+</sup>CD5<sup>-</sup>CD23<sup>+</sup>) cells in PeC, GC B (B220<sup>+</sup>Fas<sup>+</sup>GL7<sup>+</sup>) in PPs and T1 (CD19<sup>+</sup>CD93<sup>+</sup>IgM<sup>+</sup>CD23<sup>-</sup>), T2 (CD19<sup>+</sup>CD93<sup>+</sup>IgM<sup>+</sup>CD23<sup>+</sup>), T3 (CD19<sup>+</sup>CD93<sup>+</sup>IgM<sup>-</sup>CD23<sup>+</sup>), CD23<sup>-</sup>CD21<sup>lo</sup> (CD19<sup>+</sup>CD93<sup>-</sup>CD23<sup>-</sup>CD21<sup>lo</sup>), FO B (CD19<sup>+</sup>CD93<sup>-</sup>CD23<sup>+</sup>CD21<sup>lo</sup>), MZ B (CD19<sup>+</sup>CD93<sup>-</sup>CD23<sup>-</sup>CD21<sup>hi</sup>), GC B (B220<sup>+</sup>Fas<sup>+</sup>GL7<sup>+</sup>), plasma (CD138<sup>+</sup>TACI<sup>+</sup>) cells, and ABCs (CD19<sup>+</sup>B220<sup>hi</sup>CD23<sup>-</sup>CD21<sup>lo</sup>CD11b<sup>+</sup>CD11c<sup>+</sup>) in spleen from aged WT (n=3) and aged Fcrl5 Tg (n=3-4) mice. Data are representative of two or three independent experiments. Statistical data are

shown as mean values with s.d., and data were analyzed by Mann-Whitney test. \* $P < 0.05$ , \*\* $P < 0.01$ , \*\*\*\* $P < 0.0001$ .

**Supplementary Figure 4. Autoantibody production and B cell activation in imiquimod-treated Fcrl5 Tg mice.** (A) ANAs production in serum from imiquimod-treated (IMQ+) WT (n=16) and Fcrl5 Tg (n=18) for 2, 4, and 8 weeks, detected by immunofluorescence assay using HEp-2 cells. Data are pooled from three independent experiments. (B) Representative histograms and gMFIs of CD69, CD80, CD86, MHC-II, and PD-L1 expression levels on splenic CD19<sup>+</sup> cells isolated from imiquimod-untreated (IMQ-) WT (n=9) and Fcrl5 Tg (n=9) or -treated (IMQ+) WT (n=17) and Fcrl5 Tg (n=18) mice. Data are pooled from three independent experiments. Statistical data are shown as mean values with s.d., and data were analyzed by one-way ANOVA with Tukey's multiple comparisons test. \* $P < 0.05$ , \*\* $P < 0.01$ , \*\*\*\* $P < 0.0001$ .

**Supplementary Figure 5. Requirement of antigen recognition via BCR for imiquimod-induced inflammation.** (A) Absolute number of splenocytes, CD19<sup>+</sup>, and CD4<sup>+</sup> cells in spleen from imiquimod-untreated (IMQ-) WT (n=6-8) and MD4 Tg (n=6-8) or -treated (IMQ+) WT (n=12) and MD4 Tg (n=12) mice. Data are pooled from two independent experiments. (B) Representative flow cytometry plots and absolute numbers of ABCs (CD19<sup>+</sup>B220<sup>hi</sup>CD23<sup>-</sup>CD21<sup>lo</sup>CD11b<sup>+</sup>CD11c<sup>+</sup>) from imiquimod-untreated (IMQ-) WT (n=6) and MD4 Tg (n=6) or -treated (IMQ+) WT (n=10) and MD4 Tg (n=10) mice. Data are pooled from two independent experiments. (C) Representative flow cytometry plots (left) and absolute numbers (right) of CD4<sup>+</sup> T cell subsets: effector T (CD4<sup>+</sup>CD25<sup>-</sup>CD62L<sup>-</sup>CD44<sup>hi</sup>) and CD4<sup>+</sup>IFN- $\gamma$ <sup>+</sup> cells from imiquimod-untreated (IMQ-) WT (n=6) and MD4 Tg (n=6) or -treated (IMQ+) WT (n=12) and MD4 Tg (n=12) mice. Data are pooled from two independent experiments. Statistical data are shown as mean values with s.d., and data were analyzed by one-way ANOVA with Tukey's multiple comparisons test. \* $P < 0.05$ , \*\* $P < 0.01$ , \*\*\* $P < 0.001$ , \*\*\*\* $P < 0.0001$ .
